# Supplementary material
Source: MDPI journal article supplement (https://www.mdpi.com/2072-666X/6/8/1180)
Supplement: s1 [file s1]

## Supplementary Materials

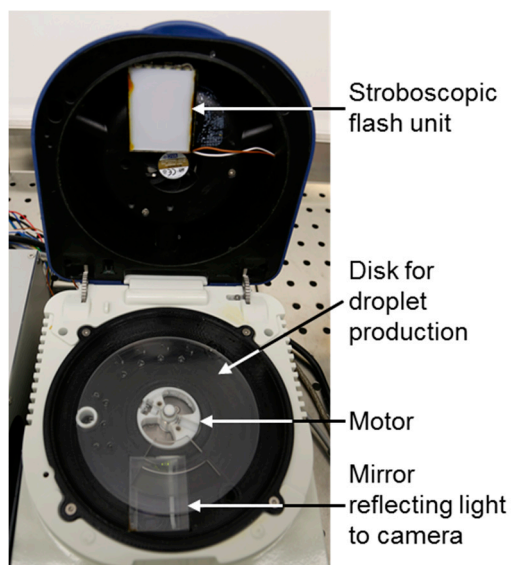

**Figure S1.** Photographic image of the (opened) LabDisk player with a disk for high throughput centrifugal step emulsification. The transparent disk is mounted to a motor for control of rotation. The lid of the player has a stroboscopic flash unit that emits light which passes the disk and is reflected to a camera (not shown here) by a mirror in the base of the LabDisk player.

**Table S1.** Measurements of structures used. The numbers after the # refer to the positions of the structure on the disk as depicted in Figure S2.

| Feature                                        | Size              |
|------------------------------------------------|-------------------|
| Inlet chamber volume; #1                       | 1.26 mL           |
| Channel width (at inlet chamber exit; #2)      | 400 $\mu\text{m}$ |
| Channel depth (at inlet chamber exit; #2)      | 280 $\mu\text{m}$ |
| Channel width (after 1st split; #3)            | 200 $\mu\text{m}$ |
| Channel depth (after 1st split; #3)            | 280 $\mu\text{m}$ |
| Channel width (before 2nd split; #4)           | 280 $\mu\text{m}$ |
| Channel depth (before 2nd split; #4)           | 200 $\mu\text{m}$ |
| Channel width (after 2nd split; #5)            | 140 $\mu\text{m}$ |
| Channel depth (after 2nd split; #5)            | 200 $\mu\text{m}$ |
| Channel width (before 3rd split; #6)           | 200 $\mu\text{m}$ |
| Channel depth (before 3rd split; #6)           | 140 $\mu\text{m}$ |
| Channel width (at nozzles; #7)                 | 100 $\mu\text{m}$ |
| Channel depth (at nozzles; #7)                 | 140 $\mu\text{m}$ |
| Nozzle width; #8                               | 90 $\mu\text{m}$  |
| Nozzle depth; #8                               | 60 $\mu\text{m}$  |
| Terrace length; #8                             | 100 $\mu\text{m}$ |
| Number of nozzles; #8                          | 72                |
| Droplet collection chamber angle (“width”); #9 | 66.4°             |
| Droplet collection chamber length; #9          | 13.3 mm           |
| Droplet collection chamber depth; #9           | 2 mm              |
| Droplet collection chamber volume; #9          | 1.2 mL            |

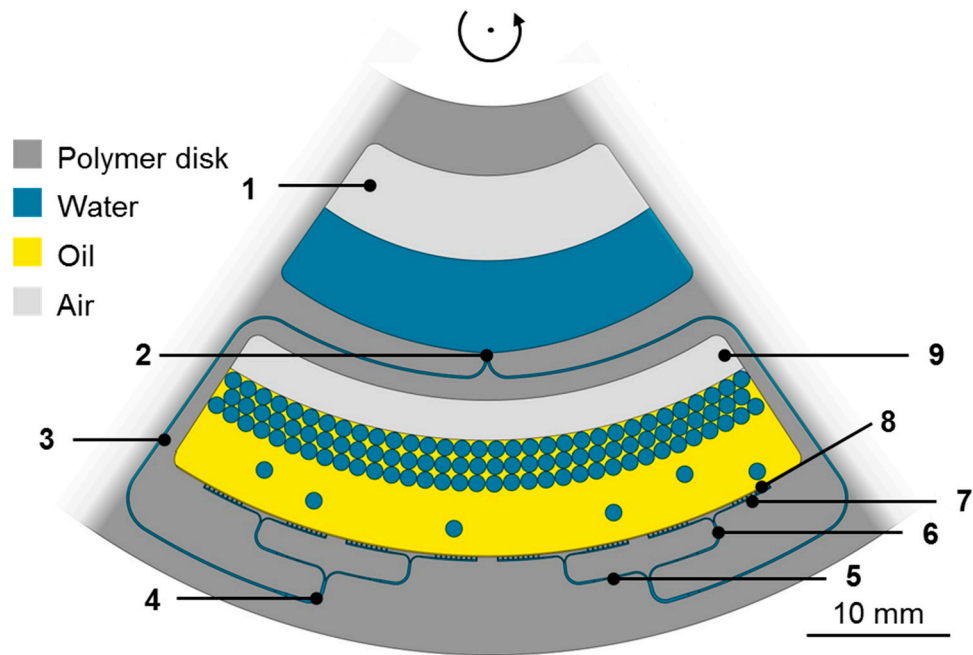

**Figure S2.** Schematic of the structure with number that correspond to the measurements in Table S1.

© 2015 by the authors; licensee MDPI, Basel, Switzerland. This article is an open access article distributed under the terms and conditions of the Creative Commons Attribution license (<http://creativecommons.org/licenses/by/4.0/>).
